# Supplementary material for: Comparative Mutagenic Effectiveness and Efficiency of Gamma Rays and Sodium Azide in Inducing Chlorophyll and Morphological Mutants of Cowpea
Source: MDPI journal article supplement (doi:10.3390/plants11101322), 2022-05-16

**Figure S1.** Region-wise production share of Cowpeas (Average 2005–2016).

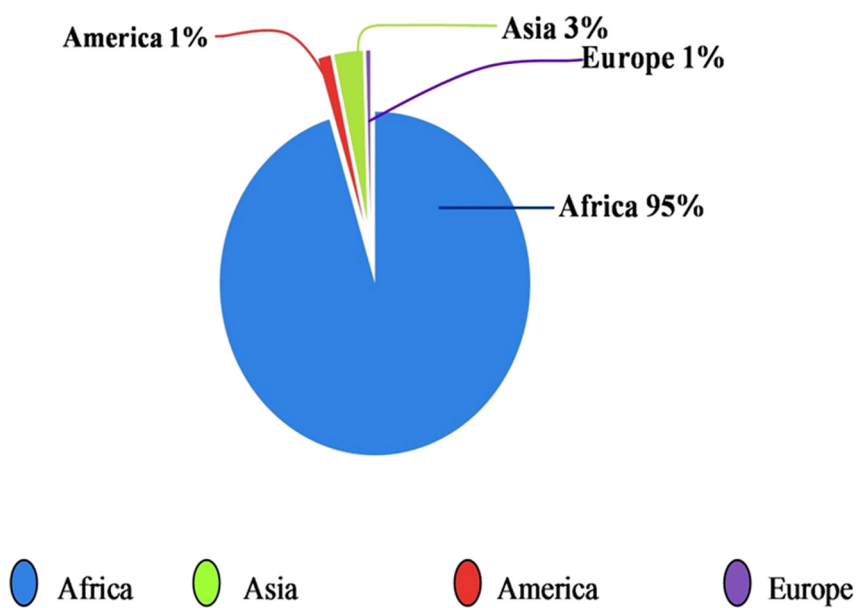

**Figure S2.** Field layout and pattern of seed sowing in a randomized complete block design (RCBD) for each cultivar (Source: Raina et al., 2020. <http://creativecommons.org/licenses/by/4.0/>).

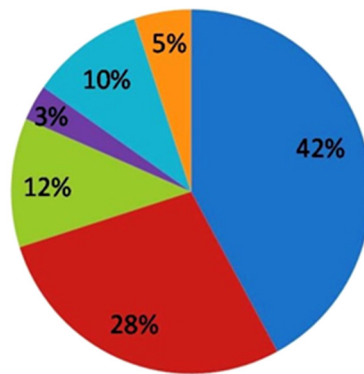

### **Gamma rays**

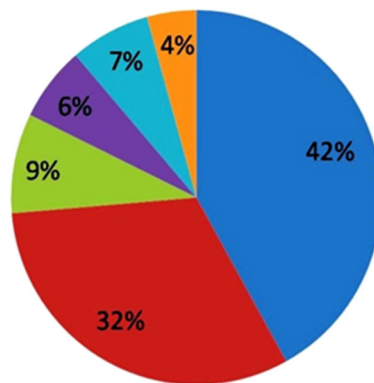

### **SA**

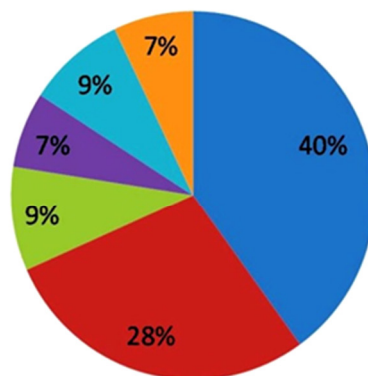

### **Gamma rays + SA**

■ Albina ■ Chlorina ■ Xantha ■ Tigrina ■ Viridis ■ Xanthaviridis

**Figure S3.** Comparative frequency and spectrum of chlorophyll mutations based on the pooled values of two varieties.

### **Gomati VU-89**

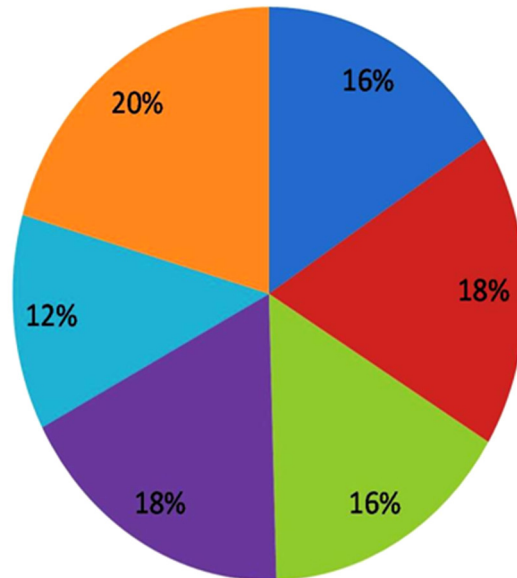

### **Pusa-578**

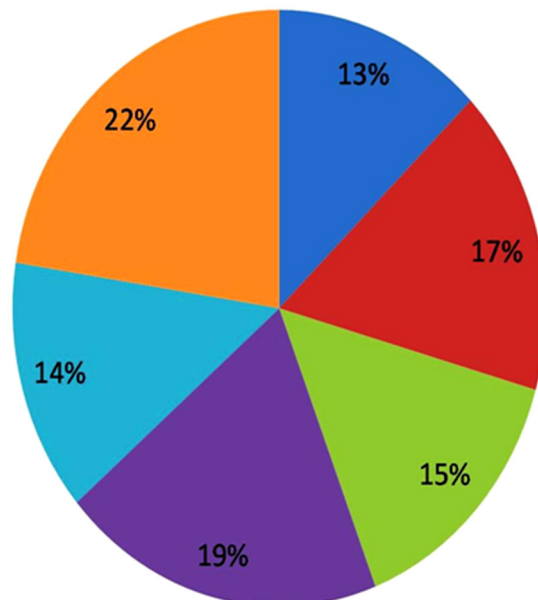

■ Plant Size ■ Growth habit ■ Leaf ■ Flower ■ Pod ■ Seed

**Figure S4.** Comparative frequency and spectrum of induced morphological mutations in cowpea are based on the pooled values of two varieties.

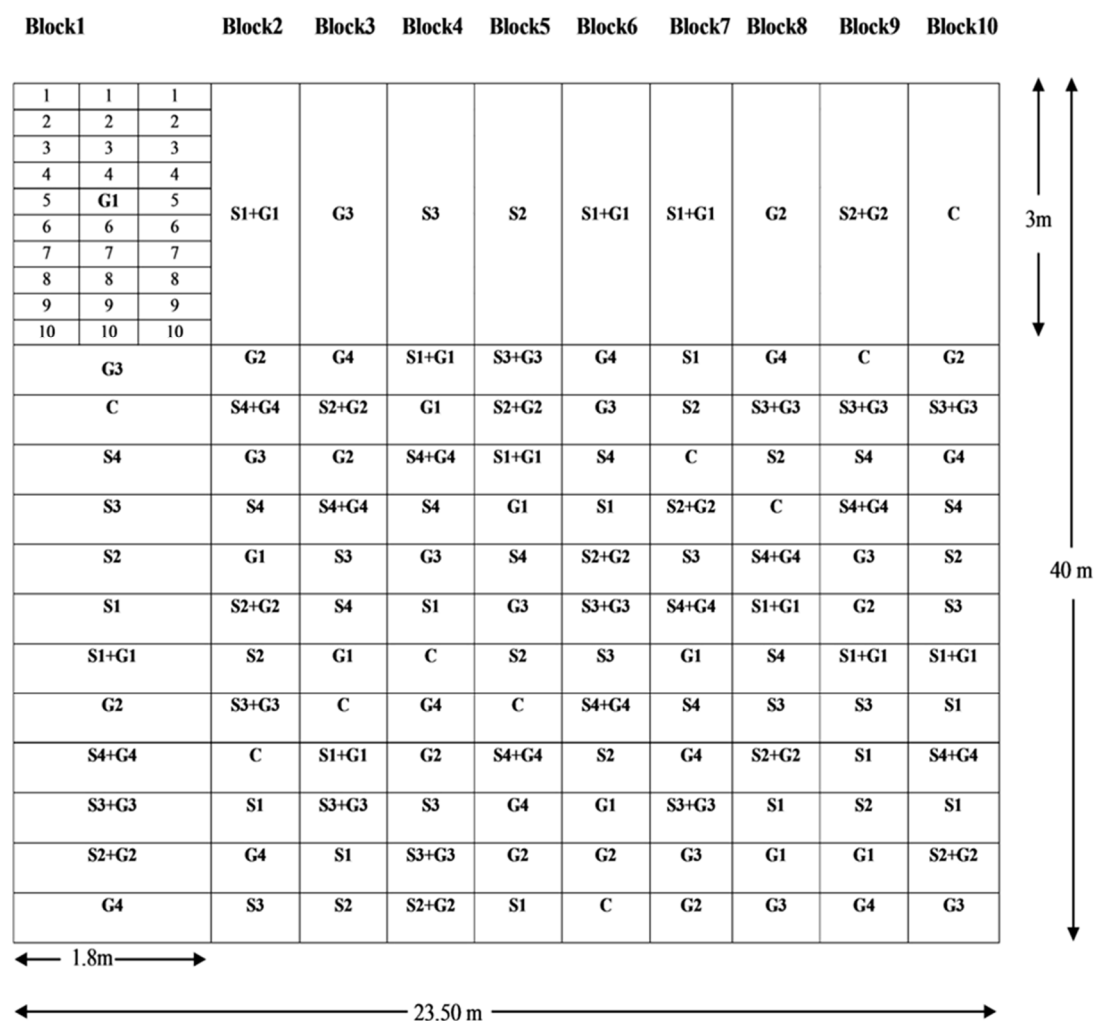

Supplement: s1 [file s1]
