# Supplementary material for: Comparative Mutagenic Effectiveness and Efficiency of Gamma Rays and Sodium Azide in Inducing Chlorophyll and Morphological Mutants of Cowpea
Source: MDPI journal article supplement (doi:10.3390/plants11101322), 2022-05-16
Supplement: s1 [file s1]

**Table S1** Details of the varieties used in the present study.

|                          | <b>Pedigree</b>                               | <b>Year / Place<br/>of release</b> | <b>Distinguishing characters</b>                                                                                                                  |
|--------------------------|-----------------------------------------------|------------------------------------|---------------------------------------------------------------------------------------------------------------------------------------------------|
| <b>var. Gomati VU-89</b> | Selection from<br>local germplasm<br>at Kanke | 1974/<br>RAU,<br>Kanke,<br>Ranchi  | Maturity 150-155 days; Avg. yield 25-30 Q/ha; Resistant to yellow mosaic virus; 13.00 g/100 seeds; Long pods; Avg. 60 pods/plant; small seed size |
| <b>var. Pusa-578</b>     | Selection from<br>cv. EC170578                | 2005/<br>IARI, New<br>Delhi        | Maturity 155-160 days; Avg. yield 5 Q/ha; Resistant to yellow mosaic virus; 21.00 g/100 seeds; Short pods; Avg. 40 pods/plant; Large seed size    |
