# Supplementary material for: Comparative Mutagenic Effectiveness and Efficiency of Gamma Rays and Sodium Azide in Inducing Chlorophyll and Morphological Mutants of Cowpea
Source: MDPI journal article supplement (doi:10.3390/plants11101322), 2022-05-16
Supplement: s1 [file s1]

**Table S2:** Description of seed germination and plant survival in each generation from M<sub>1</sub> to M<sub>2</sub> in the varieties Gomati VU-89 and Pusa-578.

| Mutagens | Gomati VU-89   |                  |                |                      |                            |                  |                |
|----------|----------------|------------------|----------------|----------------------|----------------------------|------------------|----------------|
|          | M <sub>1</sub> |                  |                | M <sub>2</sub>       |                            |                  |                |
|          | Seed Treated   | Seeds Germinated | Fertile Plants | M <sub>2</sub> Lines | Total M <sub>2</sub> Seeds | Seeds Germinated | Fertile Plants |
| C*       | 0              | 278              | 276            | 276                  | 2760                       | 2576             | 2378           |
| G1       | 300            | 261              | 260            | 260                  | 2600                       | 2297             | 2013           |
| G2       | 300            | 255              | 254            | 254                  | 2540                       | 2184             | 1864           |
| G3       | 300            | 245              | 243            | 243                  | 2430                       | 2009             | 1634           |
| G4       | 300            | 240              | 238            | 238                  | 2380                       | 1920             | 1542           |
| S1       | 300            | 260              | 259            | 259                  | 2590                       | 2262             | 1975           |
| S2       | 300            | 254              | 252            | 252                  | 2520                       | 2167             | 1835           |
| S3       | 300            | 246              | 243            | 243                  | 2430                       | 2025             | 1647           |
| S4       | 300            | 238              | 233            | 233                  | 2330                       | 1895             | 1478           |
| G1S1     | 300            | 257              | 255            | 255                  | 2550                       | 2219             | 1893           |
| G2S2     | 300            | 245              | 243            | 243                  | 2430                       | 2033             | 1660           |
| G3S3     | 300            | 235              | 230            | 230                  | 2300                       | 1848             | 1429           |
| G4S4     | 300            | 228              | 225            | 225                  | 2250                       | 1748             | 1316           |
| T        | 3600           | 2964             | 2935           | 2935                 | 29350                      | 24607            | 20287          |
| Mutagens | Pusa-578       |                  |                |                      |                            |                  |                |
|          | M <sub>1</sub> |                  |                | M <sub>2</sub>       |                            |                  |                |
|          | Seed Treated   | Seeds Germinated | Fertile Plants | M <sub>2</sub> Lines | Total M <sub>2</sub> Seeds | Seeds Germinated | Fertile Plants |
| C*       | 0              | 272              | 270            | 270                  | 2700                       | 2484             | 2269           |
| G1       | 300            | 251              | 250            | 250                  | 2500                       | 2125             | 1792           |
| G2       | 300            | 245              | 244            | 244                  | 2440                       | 2033             | 1660           |
| G3       | 300            | 230              | 238            | 238                  | 2380                       | 1944             | 1562           |
| G4       | 300            | 220              | 233            | 233                  | 2330                       | 1872             | 1466           |
| S1       | 300            | 250              | 258            | 258                  | 2580                       | 2279             | 1983           |
| S2       | 300            | 244              | 242            | 242                  | 2420                       | 2033             | 1653           |
| S3       | 300            | 229              | 233            | 233                  | 2330                       | 1856             | 1460           |
| S4       | 300            | 219              | 226            | 226                  | 2260                       | 1725             | 1317           |
| G1S1     | 300            | 242              | 245            | 245                  | 2450                       | 2050             | 1688           |
| G2S2     | 300            | 225              | 232            | 232                  | 2320                       | 1872             | 1454           |
| G3S3     | 300            | 210              | 224            | 224                  | 2240                       | 1732             | 1311           |
| G4S4     | 300            | 205              | 202            | 202                  | 2020                       | 1522             | 1116           |
| T        | 3600           | 2770             | 2827           | 2827                 | 28270                      | 23043            | 18462          |

\*For control (C) set 300 seeds per variety were also sown in the same field.
